# Supplementary material for: Reciprocal expression of MADS-box genes and DNA methylation reconfiguration initiate bisexual cones in spruce
Source: Springer Nature journal article supplement (doi:10.1038/s42003-024-05786-6), 2024-01-19
Supplement: 42003_2024_5786_MOESM2_ESM.pdf [file 42003_2024_5786_MOESM2_ESM.pdf]

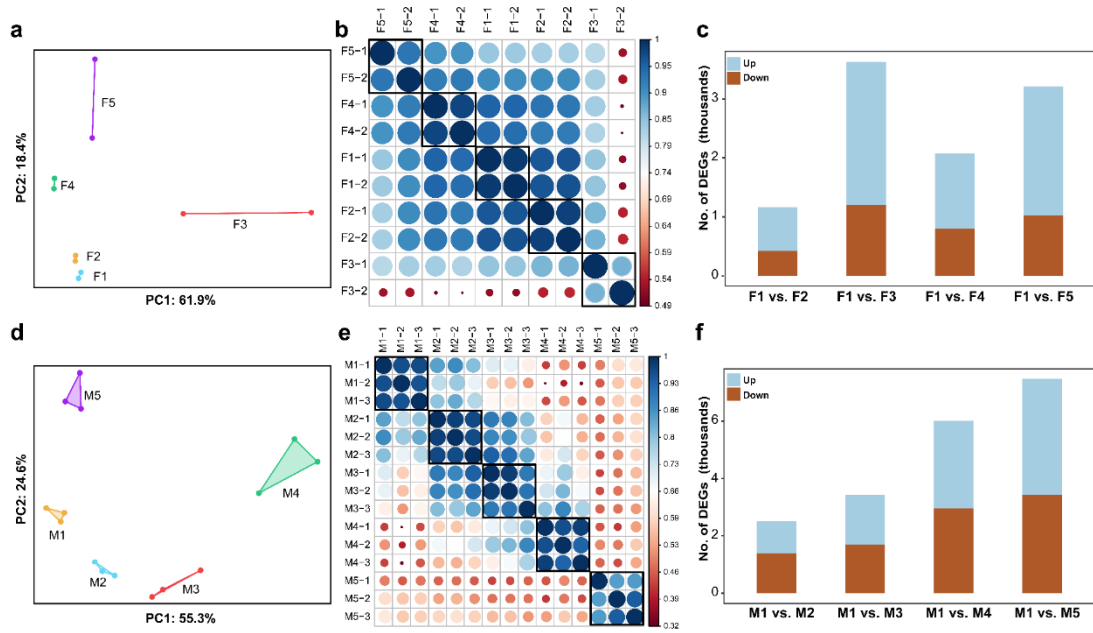

**Supplementary Figure 1. Correlation analysis and differential expression**

**analysis of M1-M5 and F1-F5. a-b** Principal component analysis (PCA) and Pearson correlation coefficient analysis among F1, F2, F3, F4 and F5. **c** Number of DEGs of F2, F3, F4, and F5 relative to F1. **d-e** PCA and Pearson correlation coefficient analysis among M1, M2, M3, M4 and M5. **f** Number of DEGs of M2, M3, M4, and M5 relative to M1.

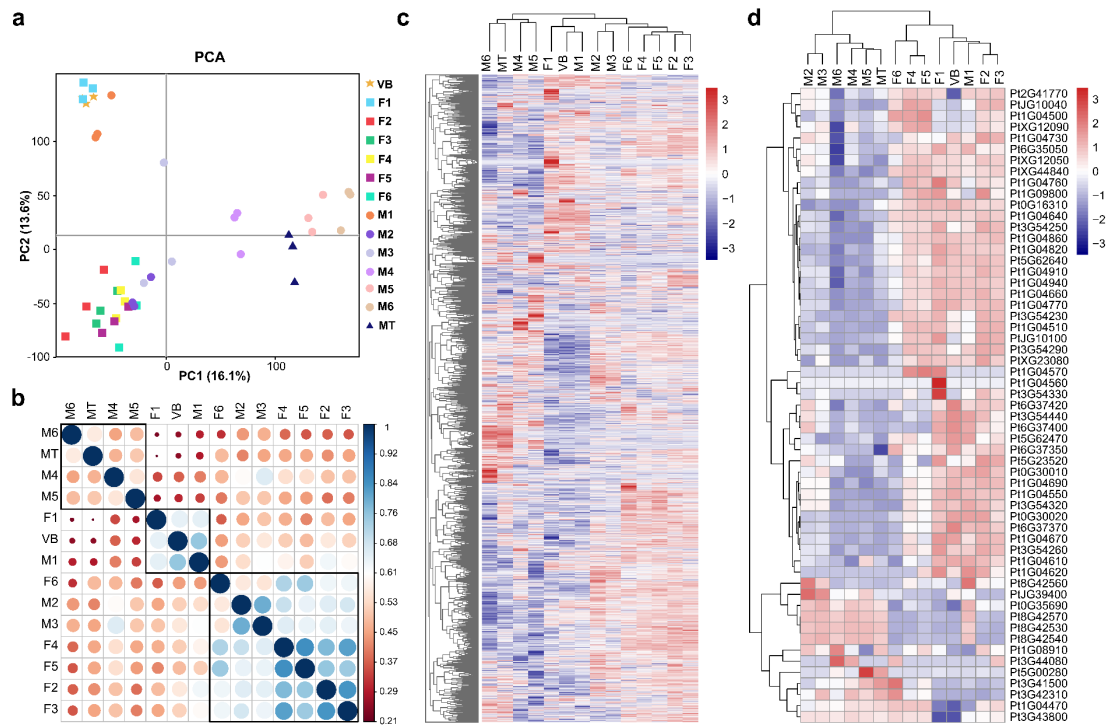

**Supplementary Figure 2. Clustering analysis of transcriptome and MADS-box gene expression profiles in *Pinus tabulaeformis*.** **a-c** Principal component analysis (PCA), Pearson correlation coefficient and hierarchical clustering analysis of transcriptome expression profiles. **d** Hierarchical clustering analysis of MADS-box gene expression profiles. All the samples analyzed were from Niu et al. (2016). F, female cones; M, male cones; MT, male parts of the bisexual cones; VB, vegetative buds.



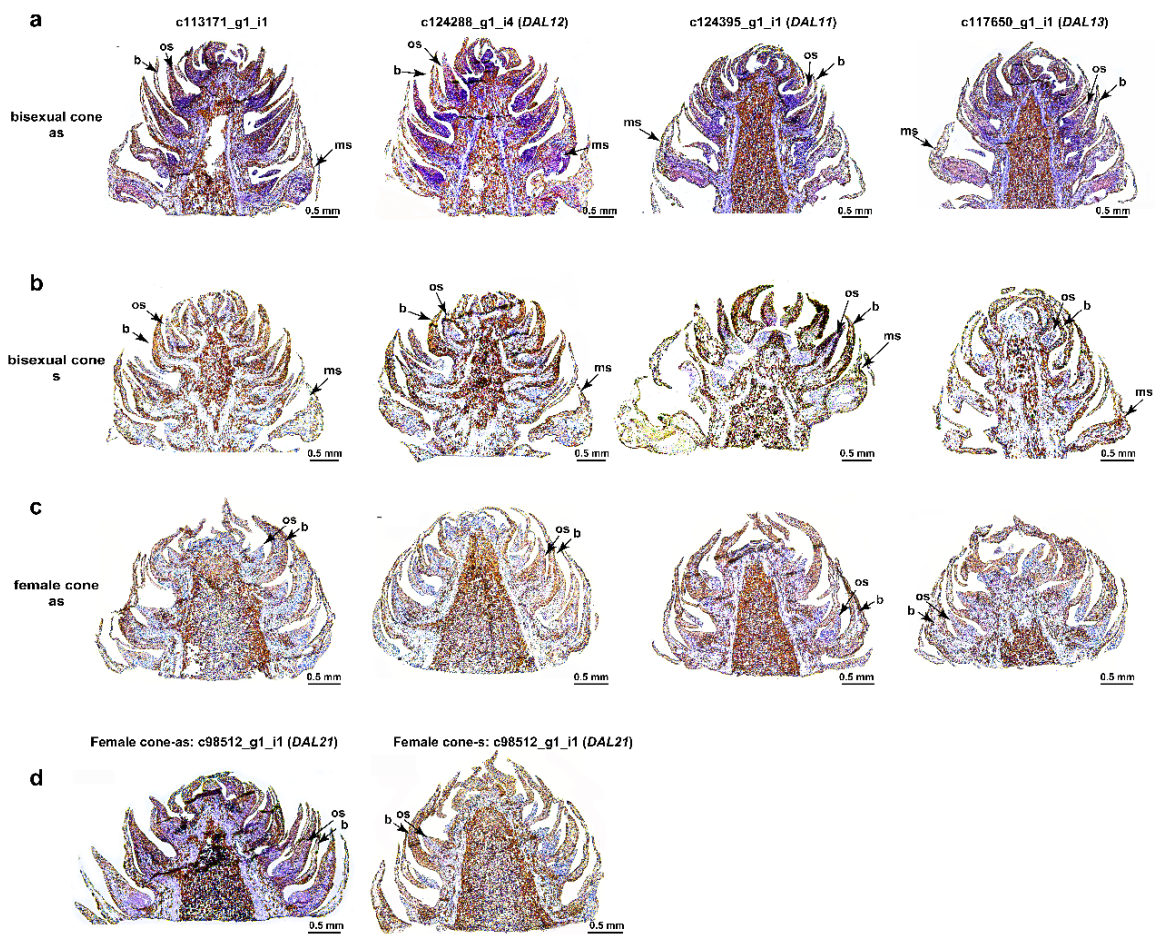

**Supplementary Figure 3. *In situ* localization of B-class genes and *PcDAL21*. a-b**

*In situ* localization of B-class genes in bisexual cones with antisense and sense probes.

**c** *In situ* localization of B-class genes in female cones with antisense probes. **d** *In situ*

localization of *PcDAL21* in female cones with antisense and sense probes. os,

ovuliferous scale; b, bract; ms, microsporophyll. All bisexual and female cones used

in *in situ* localization were collected on 7 April, 2019.

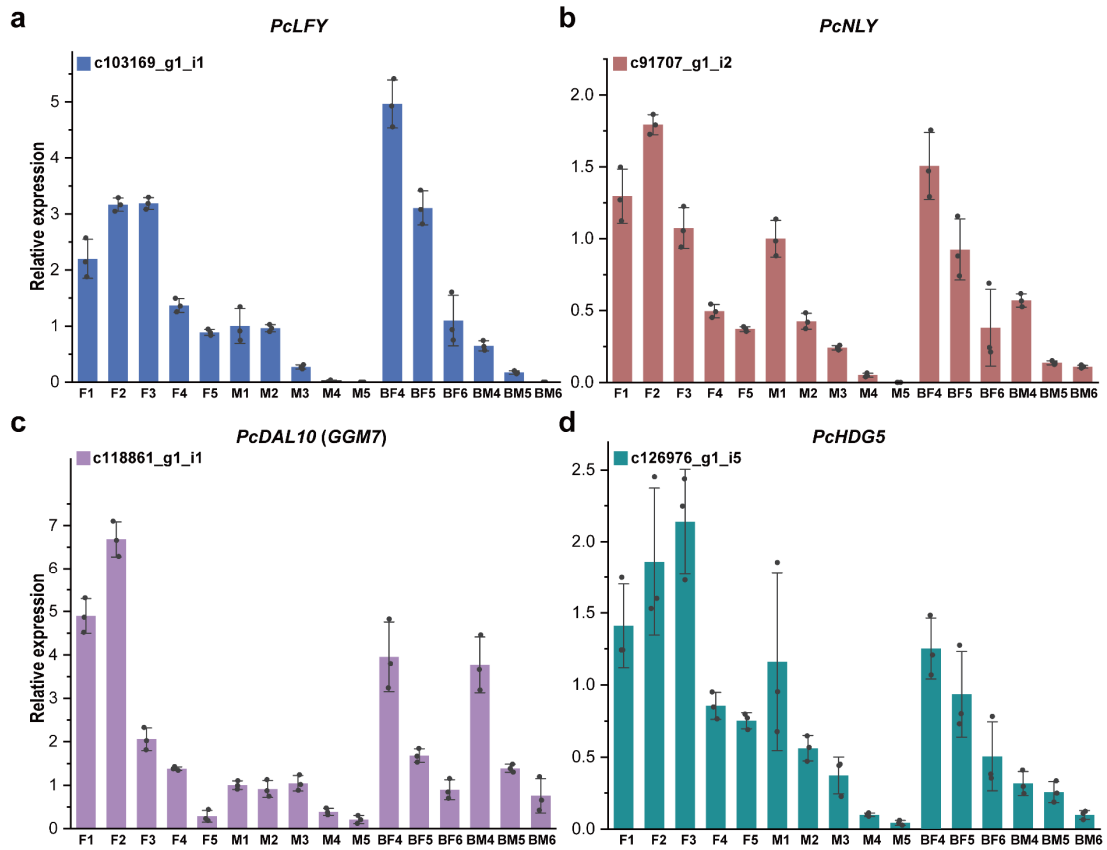

**Supplementary Figure 4. QRT-PCR analysis of *PcLFY* (a), *PcNLY* (b), *PcDAL10* (c), and *PcHDG5* (d). The histograms show the mean  $\pm$  SD (standard deviation) (n = 3 biological independent duplications).**

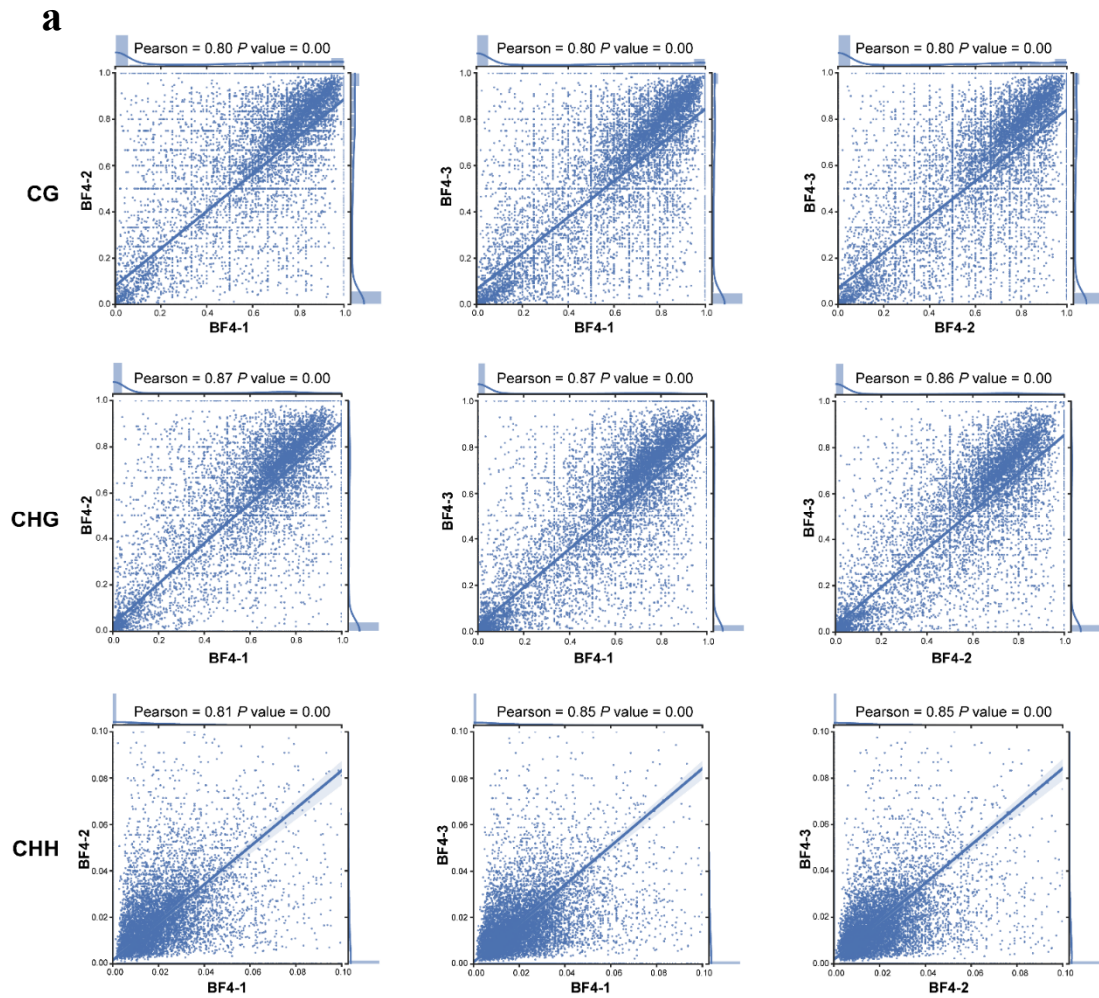

**Supplementary Figure 5. DNA methylation correlation analysis among**

**replicates.** The Pearson correlation coefficient was estimated based on the methylome data of three biological replicates using Python package Scipy. **a** BF4, **b** BM4, **c** F4, **d** M4.

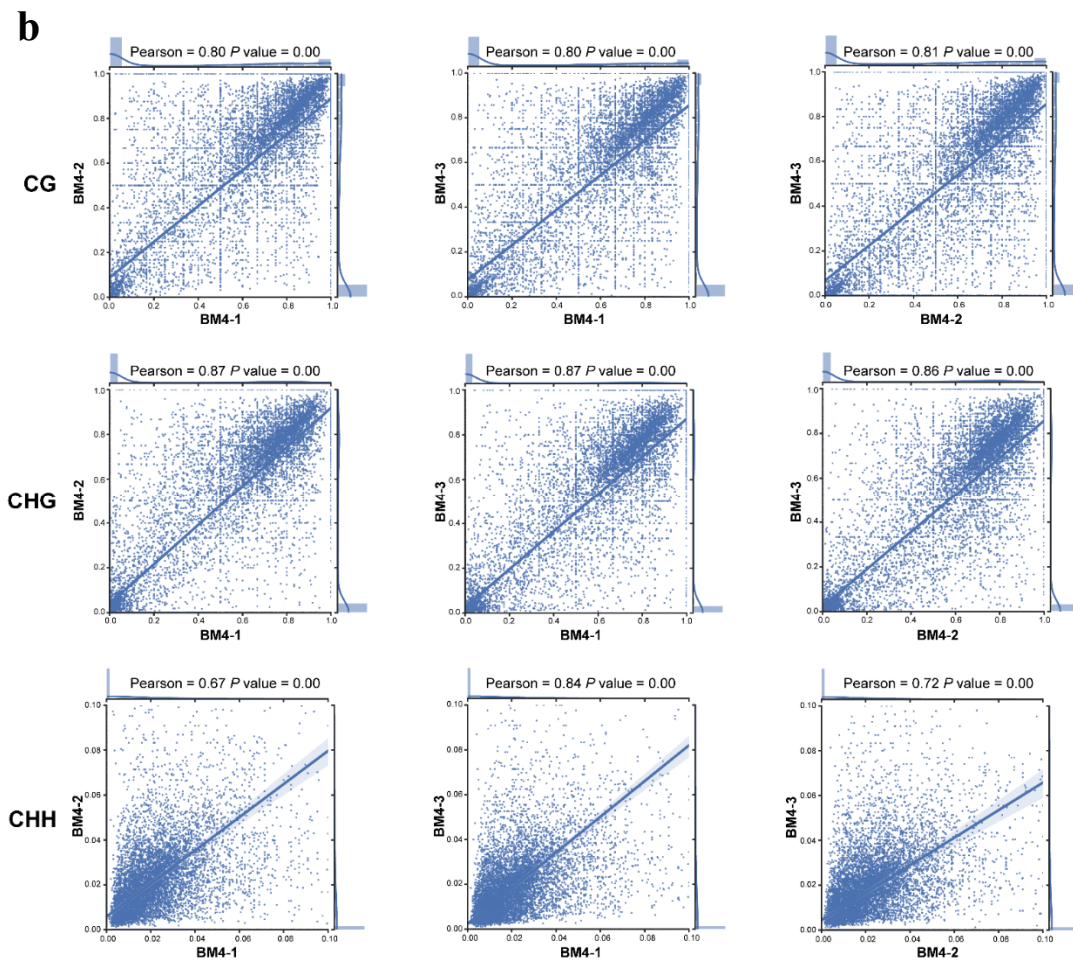

**Supplementary Figure 5. DNA methylation correlation analysis among replicates.** The Pearson correlation coefficient was estimated based on the methylome data of three biological replicates using Python package Scipy (Continued). **a** BF4, **b** BM4, **c** F4, **d** M4.

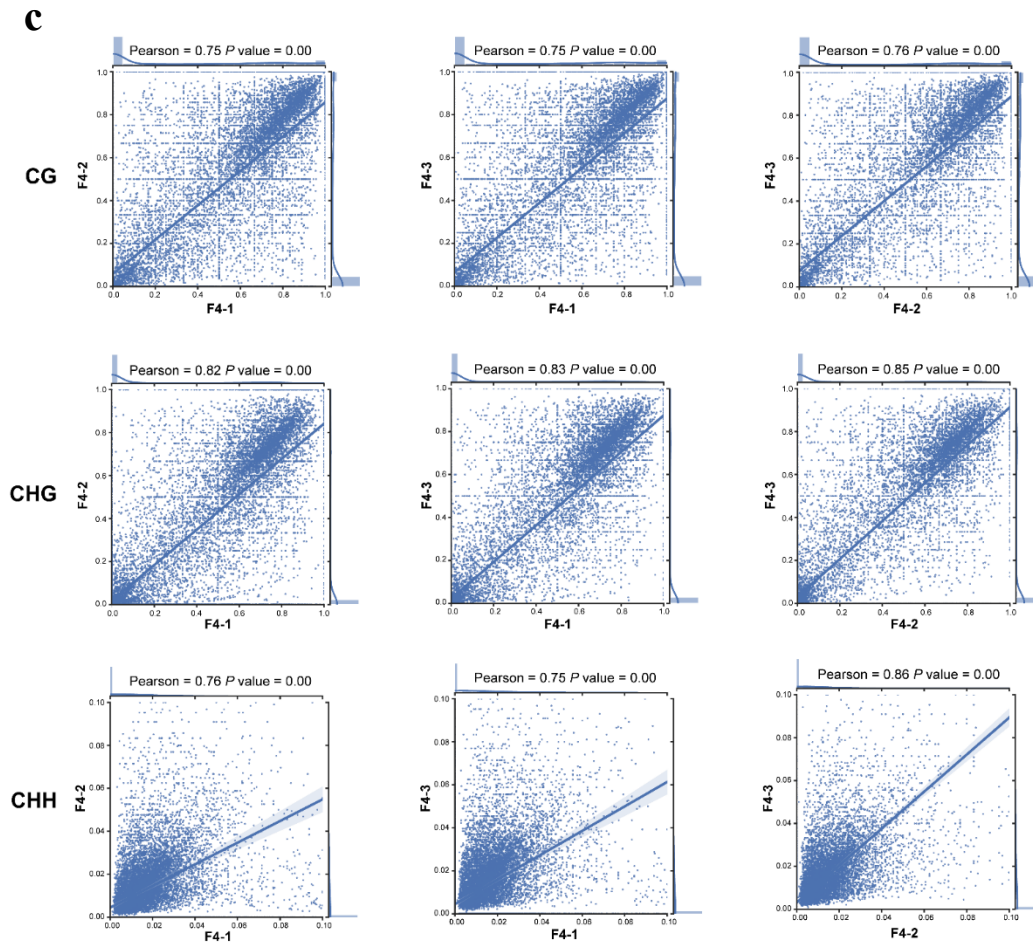

**Supplementary Figure 5. DNA methylation correlation analysis among replicates.** The Pearson correlation coefficient was estimated based on the methylome data of three biological replicates using Python package Scipy (Continued). **a** BF4, **b** BM4, **c** F4, **d** M4.



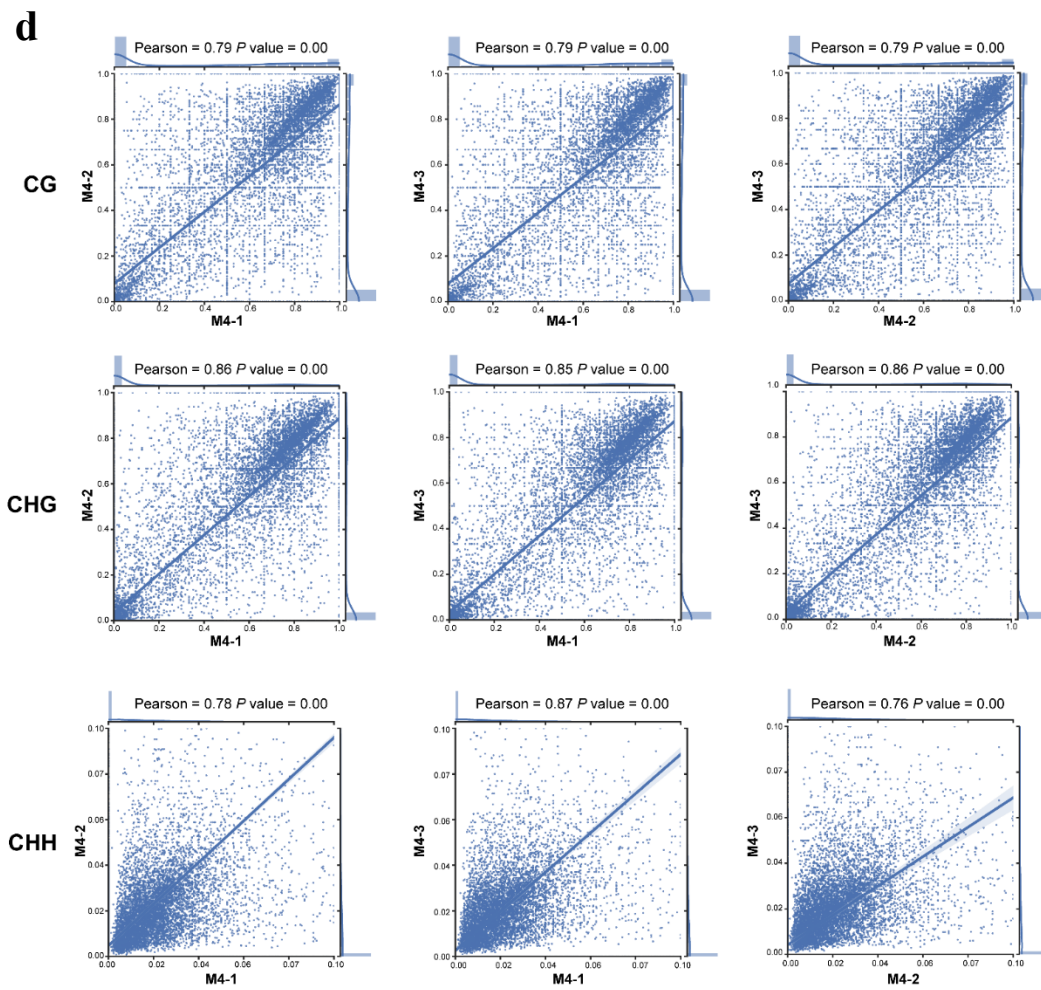

**Supplementary Figure 5. DNA methylation correlation analysis among replicates.** The Pearson correlation coefficient was estimated based on the methylome data of three biological replicates using Python package Scipy (Continued). **a** BF4, **b** BM4, **c** F4, **d** M4.

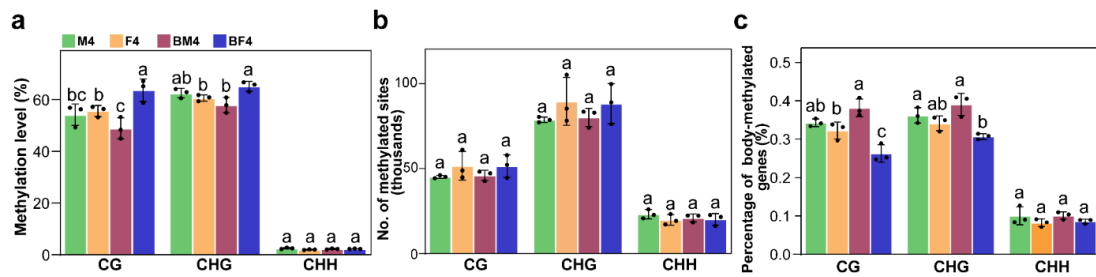

**Supplementary Figure 6. DNA methylation characterization of M4, F4, BM4 and**

**BF4. a** DNA methylation levels. **b** Number of methylated cytosine sites. **c** Percentage

of body-methylated genes. Statistical analysis was conducted using the One-way

ANOVA followed by LSD (least significant difference) analysis based on the data

from three biological duplications of M4, F4, BM4 and BF4. Different letters denote

significant differences ( $P < 0.05$ ). The histograms show the mean  $\pm$  SD (standard

deviation) ( $n = 3$  biological independent duplications). The methylation data of each

replicate was individually evaluated.

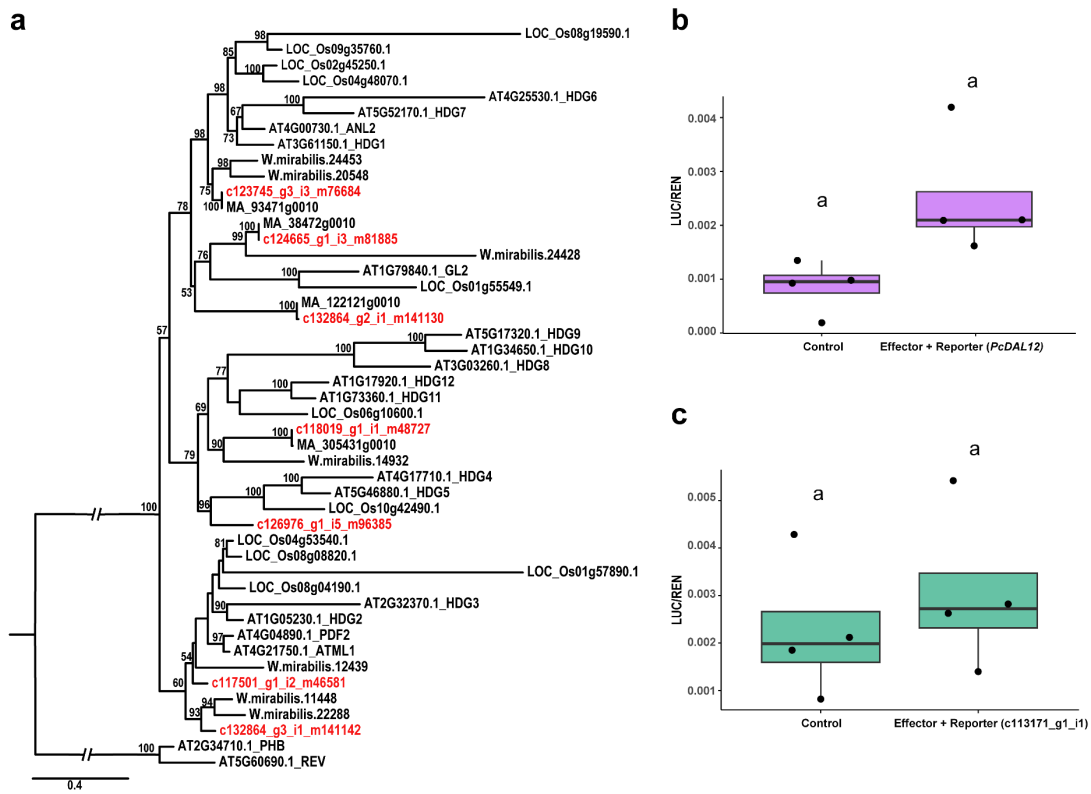

**Supplementary Figure 7. Phylogenetic analysis of HD-ZIP IV genes and results of dual-LUC transient expression assays. a** ML tree of HD-ZIP IV genes.

Quantitative analysis of dual-LUC transient expression assays of the promoter activity of **(b)** *PcDAL12* and **(c)** *c113171\_g1\_i1*. Box plot lines represent, from bottom to top, 25th percentile, median and 75th percentile of the data dispersion. Statistical analysis was conducted using the two tailed Student's *t*-test ( $n = 4$  biological independent duplications) and different letters denote significant differences at  $P$  value  $< 0.05$ .



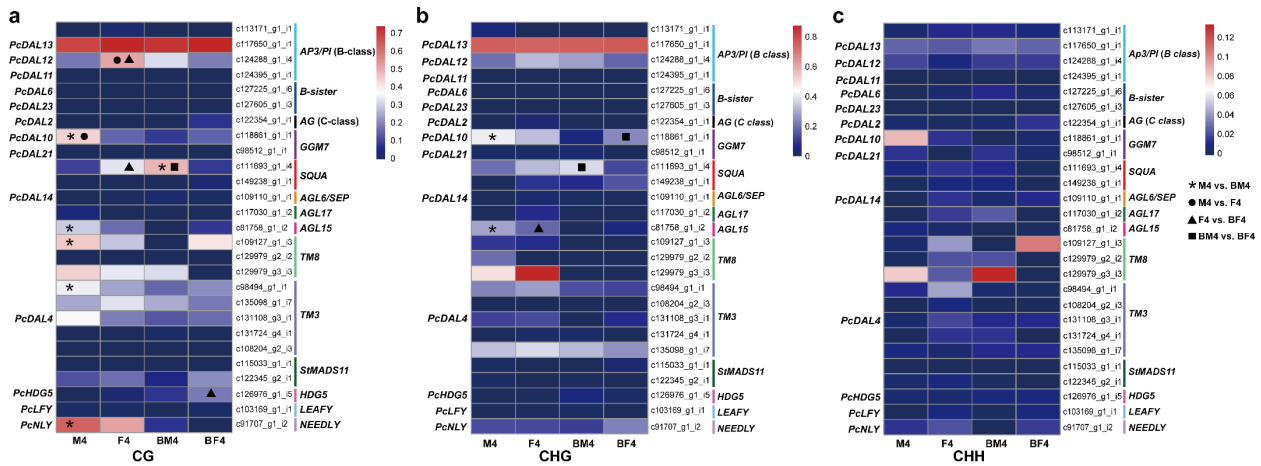

**Supplementary Figure 8. CG, CHG and CHH methylation levels in promoters of MADS-box genes, *PcLFY*, *PcNLY* and *PcHDG5*. a CG, b CHG, c CHH. Statistical analysis was conducted using the chi-square test. Asterisks, dots, triangles and rectangles represent significantly increased methylation levels ( $P$  value  $< 0.05$ ) in M4 vs. BM4, M4 vs. F4, F4 vs. BF4, and BM4 vs. BF4, respectively.**

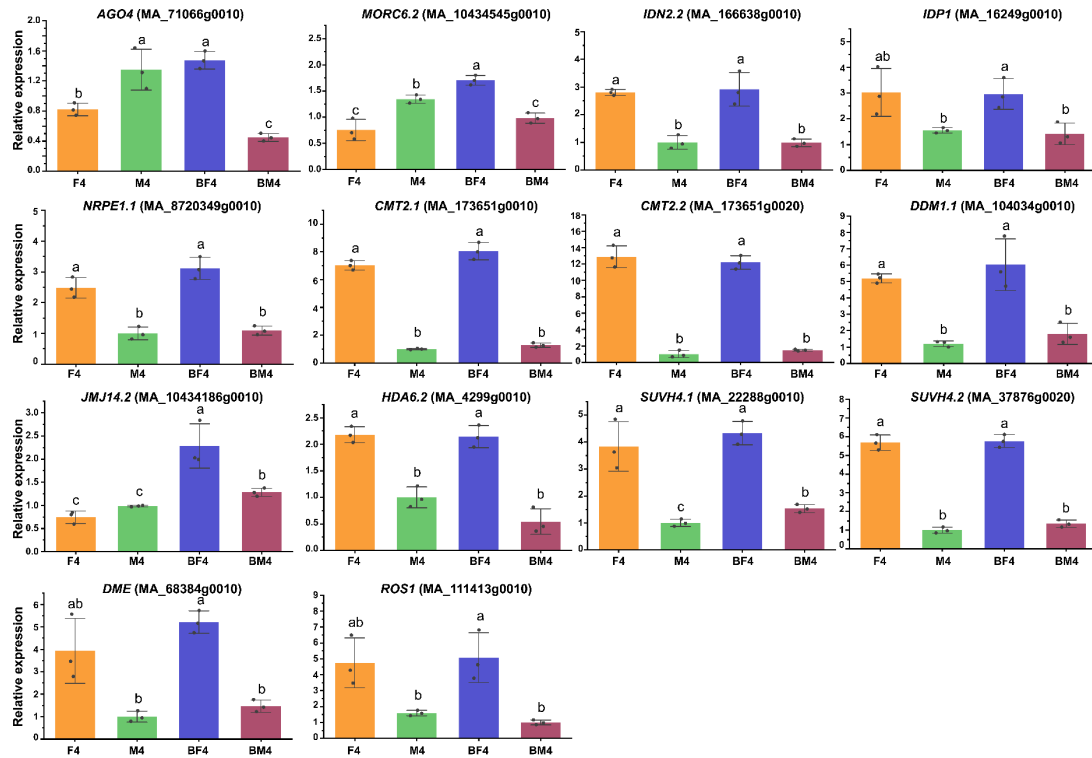

**Supplementary Figure 9. qRT-PCR analysis of DEGs involved in *de novo* methylation, maintenance methylation and demethylation processes in F4 vs. BF4 and BM4 vs. BF4.** Statistical analysis was conducted using the two tailed Student's *t*-test. Different letters denote significant differences at *P* value < 0.05. The histograms show the mean  $\pm$  SD (standard deviation) (n = 3 biological independent duplications).

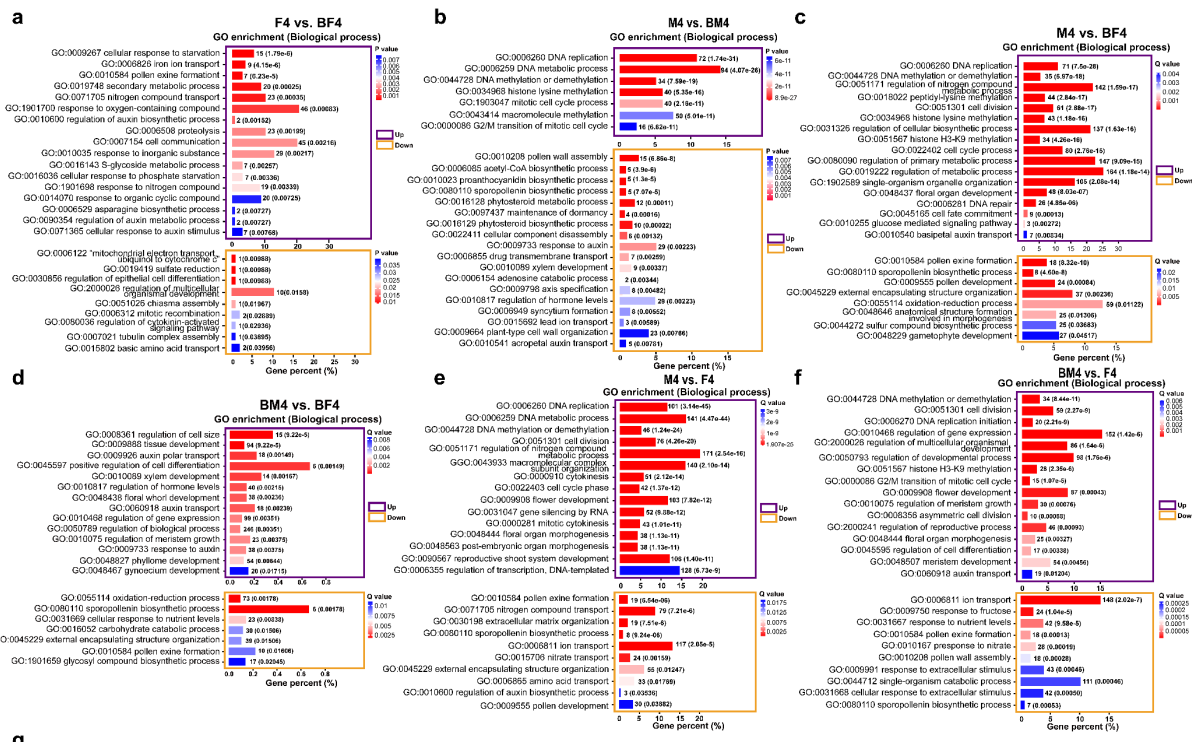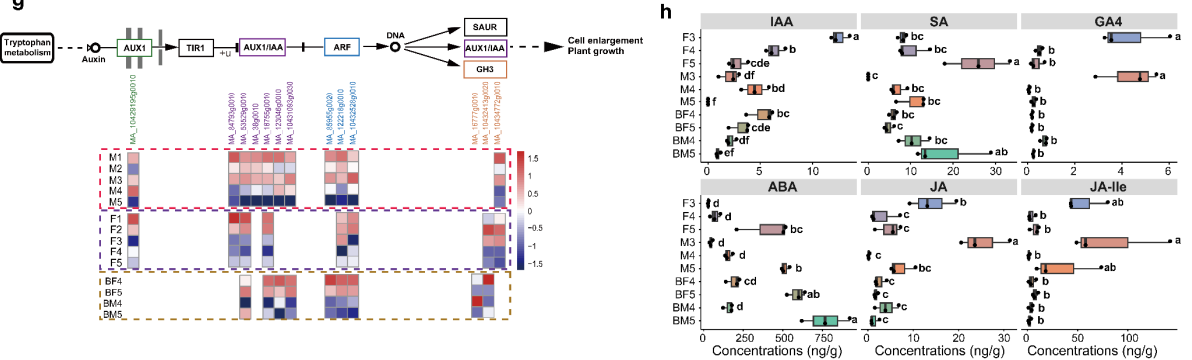

**Supplementary Figure 10. GO and KEGG enrichment of DEGs and statistics of hormone contents.** Enriched GO terms of DEGs in (a) F4 vs. BF4, (b) M4 vs. BM4, (c) M4 vs. BF4, (d) BM4 vs. BF4, (e) M4 vs. F4, and (f) BM4 vs. F4. (g) Expression pattern of DEGs related to the auxin signal transduction pathway identified in M1 vs. M5 (red dotted box), F1 vs. F5 (purple dotted box), and BM4 vs. BF4 (brown dotted box). (h) Statistical box plots of the content of six plant hormones. Box plot lines from left to right, 25th percentile, median and 75th percentile of the data dispersion. Statistical analysis was conducted using the One-way ANOVA followed

by LSD (least significant difference) analysis ( $n = 3$  biological independent duplications), and different letters denote significant differences ( $P < 0.05$ ). Due to the absence of GA1 and GA7 in all samples, as well as the low concentrations of GA3 detected only in BF4 and M5, no statistical analysis was conducted for these hormones. IAA, indole-3-acetic acid; SA, salicylic acid; GA4, gibberellin A4; ABA, abscisic acid; JA, jasmonic acid; JA-Ile, jasmonic acid-isoleucine.

**Supplementary Table 1.** Germination rates of pollen grains.

|     | <b>No. of<br/>germinated<br/>pollen grains</b> | <b>No. of<br/>ungerminated<br/>pollen grains</b> | <b>Sum</b> | <b>Germination<br/>rate (%)</b> | <b><i>P</i> value<br/>( chi-square<br/>test)</b> |
|-----|------------------------------------------------|--------------------------------------------------|------------|---------------------------------|--------------------------------------------------|
| M5  | 151                                            | 150                                              | 301        | 50.16                           | 0.44                                             |
| BM5 | 143                                            | 163                                              | 306        | 46.73                           |                                                  |

**Supplementary Table 2.** Information of 12 methylomes used in this study.

| <b>Tissue</b>                     | <b>Code</b> | <b>Collection date</b> | <b>SRA accession numbers</b> | <b>No. of raw reads</b> | <b>No. of clean reads</b> | <b>Conversion Rate (%)</b> |
|-----------------------------------|-------------|------------------------|------------------------------|-------------------------|---------------------------|----------------------------|
| Male cone                         | M4-1        | 07 April 2019          | SRR24957455                  | 119,299,529             | 112,656,436               | 98.3                       |
|                                   | M4-2        | 07 April 2019          | SRR24957454                  | 122,287,389             | 116,238,153               | 97.7                       |
|                                   | M4-3        | 07 April 2019          | SRR24957451                  | 139,503,413             | 120,467,890               | 98.2                       |
| Female cone                       | F4-1        | 07 April 2019          | SRR24957450                  | 161,572,789             | 132,158,629               | 98.2                       |
|                                   | F4-2        | 07 April 2019          | SRR24957449                  | 162,693,731             | 145,681,283               | 98.3                       |
|                                   | F4-3        | 07 April 2019          | SRR24957448                  | 142,245,506             | 129,283,033               | 98.2                       |
| Male structure of bisexual cone   | BM4-1       | 07 April 2019          | SRR24957447                  | 117,870,198             | 111,769,192               | 98.1                       |
|                                   | BM4-2       | 07 April 2019          | SRR24957446                  | 145,516,352             | 136,706,758               | 97.9                       |
|                                   | BM4-3       | 07 April 2019          | SRR24957445                  | 138,625,109             | 122,343,992               | 98.2                       |
| Female structure of bisexual cone | BF4-1       | 07 April 2019          | SRR24957444                  | 152,652,216             | 144,693,820               | 98.2                       |
|                                   | BF4-2       | 07 April 2019          | SRR24957453                  | 119,524,510             | 112,447,312               | 98.2                       |
|                                   | BF4-3       | 07 April 2019          | SRR24957452                  | 143,884,254             | 127,724,247               | 98.3                       |

**Supplementary Table 3.** Predicted *AtHDG5* (*Arabidopsis thaliana*) binding sites located within the promoter of *PcDAL13* gene according to the JASPAR database.

| DNA binding site sequence logo                                                    | Score | Relative score | Start | End  | Strand | Predicted sequence |
|-----------------------------------------------------------------------------------|-------|----------------|-------|------|--------|--------------------|
| 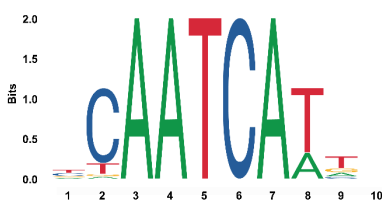 | 13.14 | 0.964          | 2025  | 2034 | -      | TCAATCAATA         |
|                                                                                   | 10.65 | 0.914          | 2771  | 2780 | +      | CTAATCATAG         |
|                                                                                   | 8.92  | 0.880          | 1556  | 1565 | +      | TTAATCAAAT         |
|                                                                                   | 8.63  | 0.873          | 195   | 204  | +      | AAAATCATTC         |
|                                                                                   | 7.78  | 0.856          | 2326  | 2335 | +      | ATAATCAAGT         |
|                                                                                   | 7.73  | 0.855          | 2036  | 2045 | -      | ATAATCAAAT         |

**Supplementary Table 4.** Information of 37 transcriptomes used in this study.

| <b>Tissue</b> | <b>Code</b> | <b>Collection date</b> | <b>SRA accession numbers</b> | <b>No. of raw reads</b> | <b>No. of clean reads</b> |
|---------------|-------------|------------------------|------------------------------|-------------------------|---------------------------|
| Male cone     | M1-1        | 19 March 2019          | SRR24889235                  | 20,719,180              | 19,676,752                |
|               | M1-2        | 19 March 2019          | SRR24889234                  | 25,709,416              | 24,203,185                |
|               | M1-3        | 19 March 2019          | SRR24889223                  | 22,739,209              | 21,446,619                |
|               | M2-1        | 25 March 2019          | SRR24889212                  | 19,898,135              | 15,656,878                |
|               | M2-2        | 25 March 2019          | SRR24889204                  | 18,628,874              | 15,870,497                |
|               | M2-3        | 25 March 2019          | SRR24889203                  | 20,082,478              | 19,467,632                |
|               | M3-1        | 01 April 2019          | SRR24889202                  | 23,973,758              | 23,122,643                |
|               | M3-2        | 01 April 2019          | SRR24889201                  | 17,751,557              | 14,385,246                |
|               | M3-3        | 01 April 2019          | SRR24889200                  | 16,939,100              | 15,343,827                |
|               | M4-1        | 07 April 2019          | SRR24889199                  | 25,393,019              | 23,710,871                |
|               | M4-2        | 07 April 2019          | SRR24889233                  | 22,442,744              | 20,910,442                |
|               | M4-3        | 07 April 2019          | SRR24889232                  | 27,606,319              | 26,204,746                |
|               | M5-1        | 13 April 2019          | SRR24889231                  | 28,887,298              | 27,099,908                |
|               | M5-2        | 13 April 2019          | SRR24889230                  | 22,201,888              | 21,349,940                |
|               | M5-3        | 13 April 2019          | SRR24889229                  | 24,331,541              | 23,006,465                |
| Female cone   | F1-1        | 19 March 2019          | SRR24889228                  | 24,660,578              | 23,260,555                |
|               | F1-2        | 19 March 2019          | SRR24889227                  | 23,231,253              | 22,130,832                |
|               | F2-1        | 25 March 2019          | SRR24889226                  | 21,536,523              | 20,786,185                |
|               | F2-2        | 25 March 2019          | SRR24889225                  | 17,000,533              | 16,119,565                |
|               | F3-1        | 01 April 2019          | SRR24889224                  | 22,713,496              | 19,223,728                |
|               | F3-2        | 01 April 2019          | SRR24889222                  | 16,588,232              | 14,210,260                |



|                                   |       |               |             |            |            |
|-----------------------------------|-------|---------------|-------------|------------|------------|
|                                   | F4-1  | 07 April 2019 | SRR24889221 | 27,437,779 | 25,595,867 |
|                                   | F4-2  | 07 April 2019 | SRR24889220 | 34,396,437 | 32,163,913 |
|                                   | F5-1  | 13 April 2019 | SRR24889219 | 22,727,525 | 20,877,478 |
|                                   | F5-2  | 13 April 2019 | SRR24889218 | 27,931,253 | 26,386,624 |
| Male structure of bisexual cone   | BM4-1 | 07 April 2019 | SRR24889210 | 22,603,820 | 21,087,741 |
|                                   | BM4-2 | 07 April 2019 | SRR24889209 | 42,252,890 | 39,539,196 |
|                                   | BM4-3 | 07 April 2019 | SRR24889208 | 26,408,979 | 24,899,933 |
|                                   | BM5-1 | 13 April 2019 | SRR24889207 | 28,936,896 | 26,862,374 |
|                                   | BM5-2 | 13 April 2019 | SRR24889206 | 20,626,480 | 19,609,321 |
|                                   | BM5-3 | 13 April 2019 | SRR24889205 | 21,775,618 | 20,456,149 |
| Female structure of bisexual cone | BF4-1 | 07 April 2019 | SRR24889217 | 21,335,033 | 19,702,815 |
|                                   | BF4-2 | 07 April 2019 | SRR24889216 | 19,951,803 | 18,648,417 |
|                                   | BF4-3 | 07 April 2019 | SRR24889215 | 26,691,993 | 24,854,520 |
|                                   | BF5-1 | 13 April 2019 | SRR24889214 | 27,709,738 | 26,471,791 |
|                                   | BF5-2 | 13 April 2019 | SRR24889213 | 25,414,621 | 24,210,616 |
|                                   | BF5-3 | 13 April 2019 | SRR24889211 | 24,280,681 | 22,969,324 |
