# Supplementary material for: Reciprocal expression of MADS-box genes and DNA methylation reconfiguration initiate bisexual cones in spruce
Source: Springer Nature journal article supplement (doi:10.1038/s42003-024-05786-6), 2024-01-19
Supplement: 42003_2024_5786_MOESM3_ESM.pdf [file 42003_2024_5786_MOESM3_ESM.pdf]

## Description of Additional Supplementary Files

**File name:** Supplementary Data 1

**Description:** All MADS-box genes used in phylogenetic reconstructions.

**File name:** Supplementary Data 2

**Description:** The body-methylated genes and their methylation levels in BF4.

**File name:** Supplementary Data 3

**Description:** The body-methylated genes and their methylation levels in BM4.

**File name:** Supplementary Data 4

**Description:** The body-methylated genes and their methylation levels in F4.

**File name:** Supplementary Data 5

**Description:** The body-methylated genes and their methylation levels in M4.

**File name:** Supplementary Data 6

**Description:** Genes with significant differences in both methylation levels and expression levels in M4 vs. F4.

**File name:** Supplementary Data 7

**Description:** Genes with significant differences in both methylation levels and expression levels in BM4 vs. BF4.

**File name:** Supplementary Data 8

**Description:** Annotation of genes with difference in both expression and methylation in M4 vs. F4 and BM4 vs. BF4.

**File name:** Supplementary Data 9

**Description:** HD-ZIP IV genes used in phylogenetic reconstruction.

**File name:** Supplementary Data 10

**Description:** All plant hormone contents.

**File name:** Supplementary Data 11

**Description:** Primers used in this study.

**File name:** Supplementary Data 12

**Description:** The numerical source data supporting both main and supplementary figures.
